# Supplementary material for: Factors Associated with Smokers Attending More Than One Smoking Cessation Clinic Visit
Source: MDPI journal article supplement (doi:10.3390/jcm12237222), 2023-11-21
Supplement: s1 [file s1]

Table S1. Fagerstrom Test for Nicotine Dependence (FTND) Questionnaire

| No. | Question                                                                                          | Answer                       |
|-----|---------------------------------------------------------------------------------------------------|------------------------------|
| 1   | How soon after waking up do you smoke your first cigarette?                                       | Within 5 minutes             |
|     |                                                                                                   | Within 6 - 30 minutes        |
|     |                                                                                                   | Within 31 - 60 minutes       |
|     |                                                                                                   | After 60 minutes             |
| 2   | Do you find it difficult to refrain from smoking in places where it is forbidden?                 | No                           |
|     |                                                                                                   | Yes                          |
| 3   | Which cigarette would you hate most to give up?                                                   | The first one in the morning |
|     |                                                                                                   | All others                   |
| 4   | How many cigarettes per day do you smoke?                                                         | 10 or less                   |
|     |                                                                                                   | 11 - 20                      |
|     |                                                                                                   | 21 - 30                      |
|     |                                                                                                   | 31 or more                   |
| 5   | Do you smoke more frequently during the first hours after waking than during the rest of the day? | No                           |
|     |                                                                                                   | Yes                          |
| 6   | Do you smoke if you are so ill that you are in bed most of the day?                               | No                           |
|     |                                                                                                   | Yes                          |
